# Supplementary material for: Psilocybin and Eugenol Reduce Inflammation in Human 3D EpiIntestinal Tissue
Source: MDPI journal article supplement (doi:10.3390/life13122345), 2023-12-15
Supplement: s1 [file s1]

Supplementary Materials

# COX-2 (72 kDa) in Figure 1

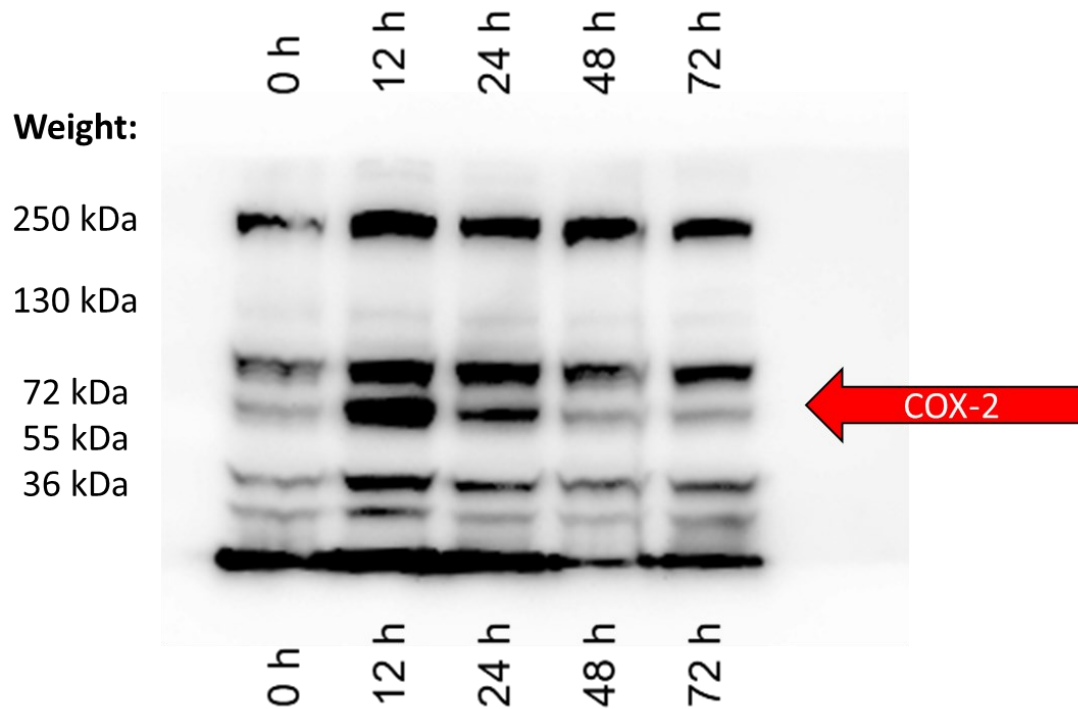

**Figure S1.** Original Western blots of proteins from human 3D EpiIntestinal tissue showing COX-2 at molecular weight of 72 kDa. Red arrow indicates bands shown in Figure 1B.

## GAPDH (36 kDa) in Figure 1

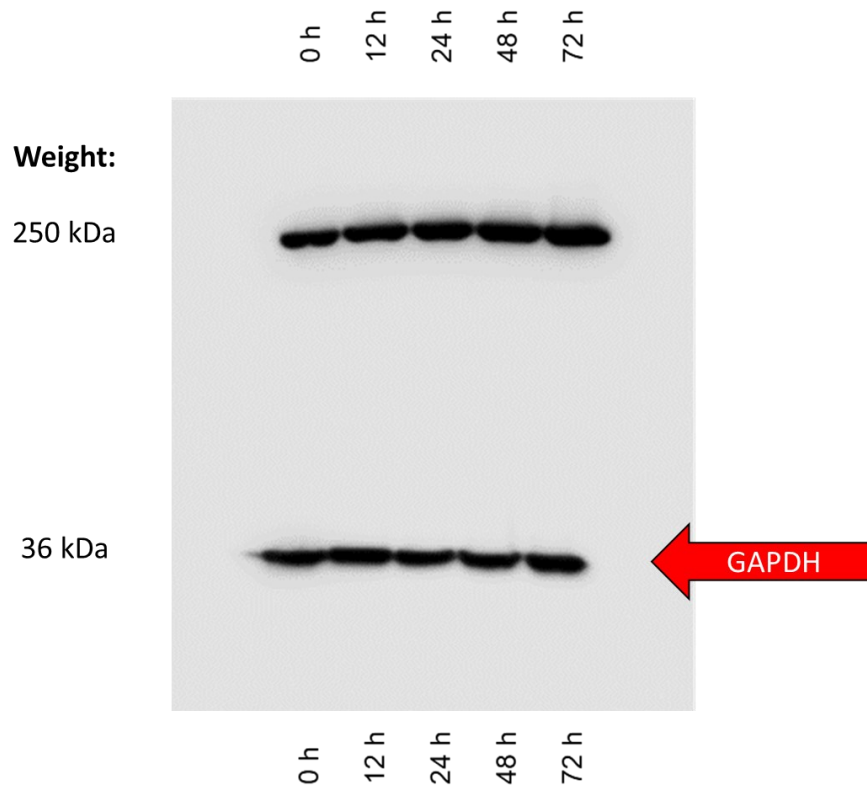

**Figure S2.** Original Western blots of proteins from human 3D EpiIntestinal tissue showing GAPDH at molecular weight of 36 kDa. Red arrow indicates bands shown in Figure 1B.
